# Supplementary material for: Profusion of G-quadruplexes on both subunits of metazoan ribosomes
Source: PubMed Central journal article supplement (PMC6910669; doi:10.1371/journal.pone.0226177), 2019-12-13
Supplement: pone.0226177.s008.pdf [file pone.0226177.s008.pdf]

The following correspond to raw images obtained from gels in Fig. 3.

|               | Human 28S |   |   |   | E. coli 16S |   |   |   |
|---------------|-----------|---|---|---|-------------|---|---|---|
| Strept. Beads | -         | + | + | + | -           | + | + | + |
| BioTASQ       | -         | - | + | + | -           | - | + | + |
| PDS           | -         | - | - | + | -           | - | - | + |

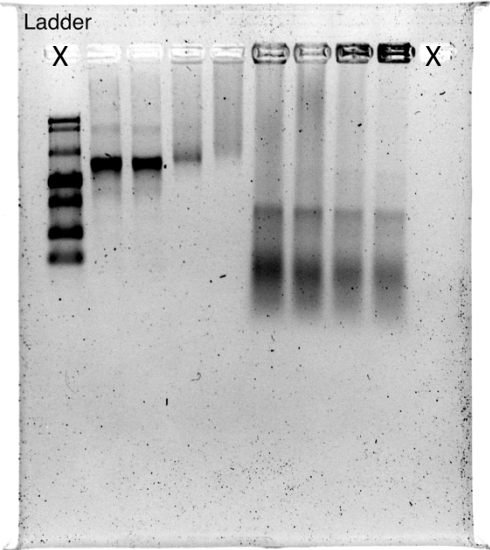

|               | Human 28S |   |   |   | Human 18S |   |   |   |
|---------------|-----------|---|---|---|-----------|---|---|---|
| Strept. Beads | -         | + | + | + | -         | + | + | + |
| BioTASQ       | -         | - | + | + | -         | - | + | + |
| PDS           | -         | - | - | + | -         | - | - | + |

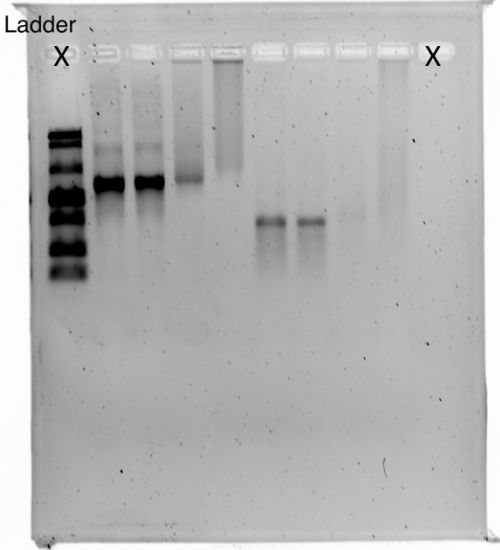

|               | T. thermophilus 23S |   |   |   |
|---------------|---------------------|---|---|---|
| Strept. Beads | -                   | + | + | + |
| BioTASQ       | -                   | - | + | + |
| PDS           | -                   | - | - | + |

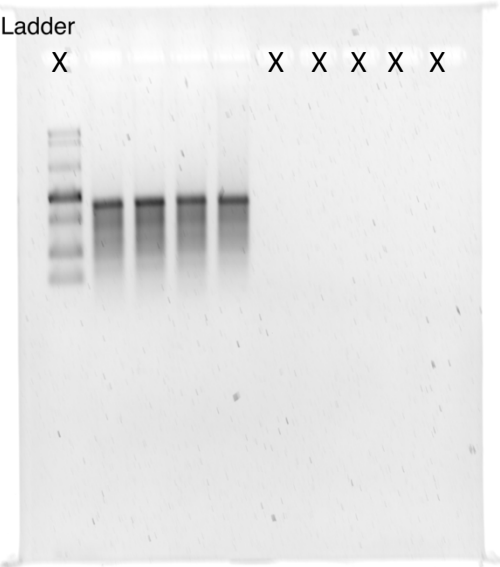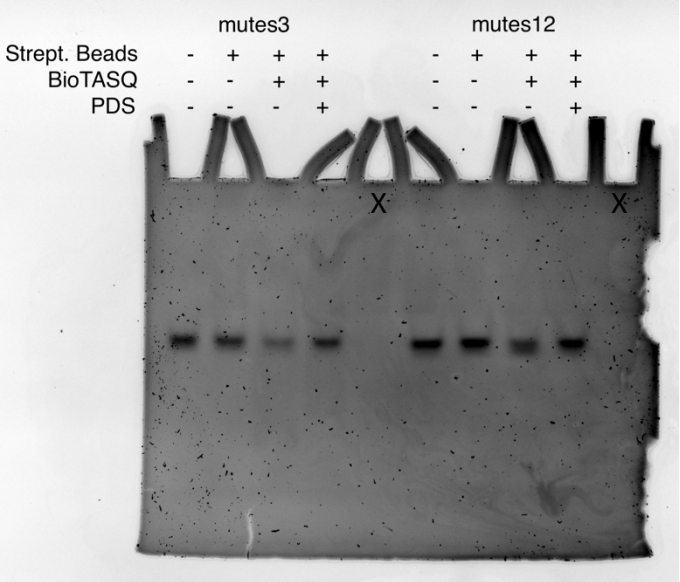

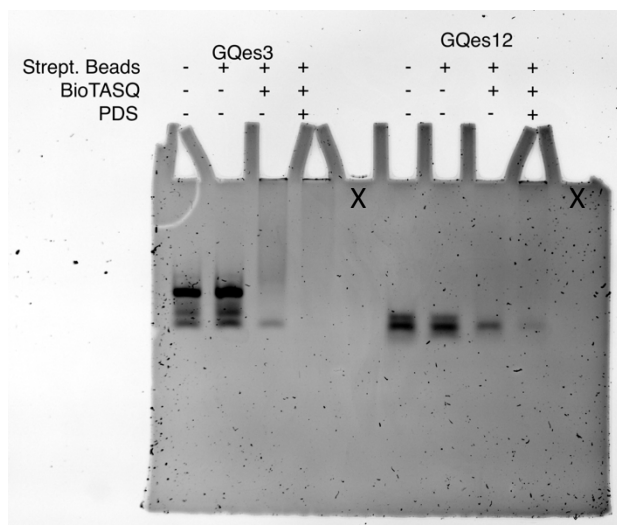

The following correspond to the raw image obtained from gel in Fig. S.6

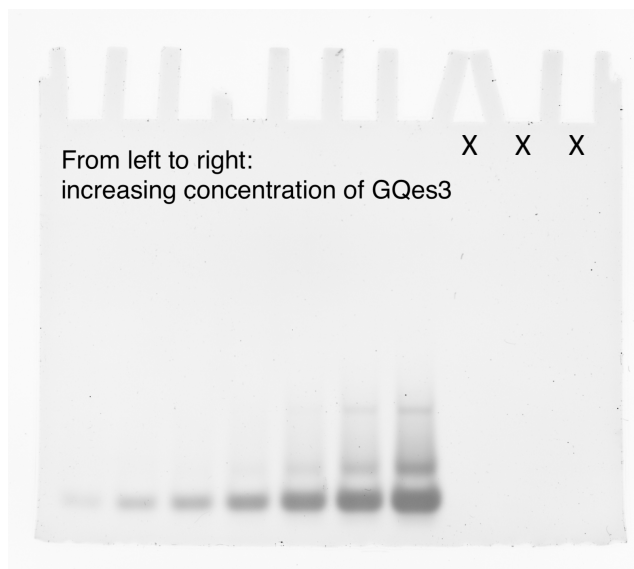

All images were taken with Azure Imager c400 (Azure Biosystems). An X above gel lanes is used to indicate lanes that were not used in the final cropped image that appears in the article.
